# Supplementary material for: Study Protocol: A Cross-Sectional Examination of Socio-Demographic and Ecological Determinants of Nutrition and Disease Across Madagascar
Source: Front Public Health. 2020 Sep 17;8:500. doi: 10.3389/fpubh.2020.00500 (PMC7527467; doi:10.3389/fpubh.2020.00500)
Supplement: Supplementary file 2 [file Data_Sheet_1.XLSX]

## Sheet: 1 Village focus group
Column heading	Question ID	Variable_Name	English question text	Malagasy question text
Section 01: Focus group composition instructions			Section 01: Focus group composition instructions	Section 01: Olona anatin'ny SAVOIR COMMUNAUTAIRE
1001.001/survey_instruc1	1001.001	survey_instruc1	Confirm focus group composition	Confirm focus group composition
1001.002/survey_instruc2	1001.002	survey_instruc2	ENUMERATOR - Please fill out this section (for the enumerator to fill out)	ENQUETEUR-Fenoy ity section ity
1001.004/num_men	1001.004	num_men	Number of men in focus group:	Lehilahy (isa):
1001.005/num_women	1001.005	num_women	Number of women in focus group:	Vehivavy (isa):
1001.006/num_total	1001.006	num_total	Total number of people in focus group:	Totalin'ny isan'ny olona:
Section 02: Transportation to certain infrastructure items			Section 02: Transportation to certain infrastructure items	Section 02: Distance à certains éléments d'infrastructure
2.1: Means of transportation to get into CSB-I			2.1: Means of transportation to get into CSB-I	2.1: Fomba fandehanana mankany amin'ny CSB-I
1002.001/csb1_walk	1002.001	csb1_walk	Walk?	Misy mandeha tongotra?
1002.002/csb1_walk_hours	1002.002	csb1_walk_hours	How many hour(s) to get there on foot?	Adiny firy raha mandeha tongotra?
1002.003/csb1_car	1002.003	csb1_car	Car?	Misy mandeha fiara?
1002.004/csb1_car_hours	1002.004	csb1_car_hours	How many hour(s) to get there by car?	Adiny firy raha mandeha fiara?
1002.005/csb1_boat	1002.005	csb1_boat	Boat?	Misy mandeha lakana?
1002.006/csb1_boat_hours	1002.006	csb1_boat_hours	How many hour(s) to get there by boat?	Adiny firy raha mandeha lakana?
1002.007/csb1_moto	1002.007	csb1_moto	Moto?	Misy mandeha moto?
1002.008/csb1_moto_hours	1002.008	csb1_moto_hours	How many hour(s) to get there by moto?	Adiny firy raha mandeha moto?
1002.009/csb1_walk_rank	1002.009	csb1_walk_rank	Rank how do you get to the CSB-I if you walk	Alaharo ny fomba fandehanana mandeha any amin'ny CSB-I raha mandeha tongotra
1002.010/csb1_walk_rank_often	1002.010	csb1_walk_rank_often	Walk very often	Mandeha tongotra tena matetika
1002.011/csb1_walk_rank_rare	1002.011	csb1_walk_rank_rare	Walk rarely	Mandeha tongotra fa tsy tena matetika
1002.012/csb1_walk_rank_never	1002.012	csb1_walk_rank_never	Never walk	Tsy mandeha tongotra mihintsy
1002.013/csb1_car_rank	1002.013	csb1_car_rank	Rank how do you get the the CSB-I if you take a car	Alaharo ny fomba fandehanana mandeha any amin'ny CSB-I raha mandeha fiara
1002.014/csb1_car_rank_often	1002.014	csb1_car_rank_often	Take a car very often	Mandeha fiara tena matetika
1002.015/csb1_car_rank_rare	1002.015	csb1_car_rank_rare	Take a car rarely	Mandeha fiara fa tsy tena matetika
1002.016/csb1_car_rank_never	1002.016	csb1_car_rank_never	Never take a car	Tsy mandeha fiara mihintsy
1002.017/csb1_moto_rank	1002.017	csb1_moto_rank	Rank how do you get to the CSB-I if you ride a moto	Alaharo ny fomba fandehanana mandeha any amin'ny CSB-I raha mandeha moto
1002.018/csb1_moto_rank_often	1002.018	csb1_moto_rank_often	Ride a moto very often	Mandeha moto tena matetika
1002.019/csb1_moto_rank_rare	1002.019	csb1_moto_rank_rare	Ride a moto rarely	Mandeha moto fa tsy tena matetika
1002.020/csb1_moto_rank_never	1002.020	csb1_moto_rank_never	Never ride a moto	Tsy mandeha moto mihintsy
1002.021/csb1_boat_rank	1002.021	csb1_boat_rank	Rank how do you get to the CSB-I if you take a boat	Alaharo ny fomba fandehanana mandeha any amin'ny CSB-I raha mandeha lakana
1002.022/csb1_boat_rank_often	1002.022	csb1_boat_rank_often	Take a boat very often	Mandeha lakana tena matetika
1002.023/csb1_boat_rank_rare	1002.023	csb1_boat_rank_rare	Take a boat rarely	Mandeha lakana fa tsy tena matetika
1002.024/csb1_boat_rank_never	1002.024	csb1_boat_rank_never	Never take a boat	Tsy mandeha lakana mihintsy
2.2: Means of transportation to get into CSB-II			2.2: Means of transportation to get into CSB-II	2.2: Fomba fandehanana mankany amin'ny CSB-II
1002.025/csb2_walk	1002.025	csb2_walk	Walk?	Misy mandeha tongotra?
1002.026/csb2_walk_hours	1002.026	csb2_walk_hours	How many hour(s) to get there on foot?	Adiny firy raha mandeha tongotra?
1002.027/csb2_car	1002.027	csb2_car	Car?	Misy mandeha fiara?
1002.028/csb2_car_hours	1002.028	csb2_car_hours	How many hour(s) to get there by car?	Adiny firy raha mandeha fiara?
1002.029/csb2_boat	1002.029	csb2_boat	Boat?	Misy mandeha lakana?
1002.030/csb2_boat_hours	1002.030	csb2_boat_hours	How many hour(s) to get there by boat?	Adiny firy raha mandeha lakana?
1002.031/csb2_moto	1002.031	csb2_moto	Moto?	Misy mandeha moto?
1002.032/csb2_moto_hours	1002.032	csb2_moto_hours	How many hour(s) to get there by moto?	Adiny firy raha mandeha moto?
1002.033/csb2_walk_rank	1002.033	csb2_walk_rank	Rank how do you get to the CSB-II if you walk	Alaharo ny fomba fandehanana mandeha any amin'ny CSB-II raha mandeha tongotra
1002.034/csb2_walk_rank_often	1002.034	csb2_walk_rank_often	Walk very often	Mandeha tongotra tena matetika
1002.035/csb2_walk_rank_rare	1002.035	csb2_walk_rank_rare	Walk rarely	Mandeha tongotra fa tsy tena matetika
1002.036/csb2_walk_rank_never	1002.036	csb2_walk_rank_never	Never walk	Tsy mandeha tongotra mihintsy
1002.037/csb2_car_rank	1002.037	csb2_car_rank	Rank how to you get the the CSB-II if you take a car	Alaharo ny fomba fandehanana mandeha any amin'ny CSB-II raha mandeha fiara
1002.038/csb2_car_rank_often	1002.038	csb2_car_rank_often	Take a car very often	Mandeha fiara tena matetika
1002.039/csb2_car_rank_rare	1002.039	csb2_car_rank_rare	Take a car rarely	Mandeha fiara fa tsy tena matetika
1002.040/csb2_car_rank_never	1002.040	csb2_car_rank_never	Never take a car	Tsy mandeha fiara mihintsy
1002.041/csb2_moto_rank	1002.041	csb2_moto_rank	Rank how do you get to the CSB-II if you ride a moto	Alaharo ny fomba fandehanana mandeha any amin'ny CSB-II raha mandeha moto
1002.042/csb2_moto_rank_often	1002.042	csb2_moto_rank_often	Ride a moto very often	Mandeha moto tena matetika
1002.043/csb2_moto_rank_rare	1002.043	csb2_moto_rank_rare	Ride a moto rarely	Mandeha moto fa tsy tena matetika
1002.044/csb2_moto_rank_never	1002.044	csb2_moto_rank_never	Never ride a moto	Tsy mandeha moto mihintsy
1002.045/csb2_boat_rank	1002.045	csb2_boat_rank	Rank how do you get to the CSB-II if you take a boat	Alaharo ny fomba fandehanana mandeha any amin'ny CSB-II raha mandeha lakana
1002.046/csb2_boat_rank_often	1002.046	csb2_boat_rank_often	Take a boat very often	Mandeha lakana tena matetika
1002.047/csb2_boat_rank_rare	1002.047	csb2_boat_rank_rare	Take a boat rarely	Mandeha lakana fa tsy tena matetika
1002.048/csb2_boat_rank_never	1002.048	csb2_boat_rank_never	Never take a boat	Tsy mandeha lakana mihintsy
2.3: Means of transportation to get to a doctor			2.3: Means of transportation to get to a doctor	2.3: Fomba fandehanana mankany amin'ny Dokotera
1002.049/doc_walk	1002.049	doc_walk	Walk?	Misy mandeha tongotra?
1002.050/doc_walk_hours	1002.050	doc_walk_hours	How many hour(s) to get there on foot?	Adiny firy raha mandeha tongotra?
1002.051/doc_car	1002.051	doc_car	Car?	Misy mandeha fiara?
1002.052/doc_car_hours	1002.052	doc_car_hours	How many hour(s) to get there by car?	Adiny firy raha mandeha fiara?
1002.053/doc_boat	1002.053	doc_boat	Boat?	Misy mandeha lakana?
1002.054/doc_boat_hours	1002.054	doc_boat_hours	How many hour(s) to get there by boat?	Adiny firy raha mandeha lakana?
1002.055/doc_moto	1002.055	doc_moto	Moto?	Misy mandeha moto?
1002.056/doc_moto_hours	1002.056	doc_moto_hours	How many hour(s) to get there by moto?	Adiny firy raha mandeha moto?
1002.057/doc_walk_rank	1002.057	doc_walk_rank	Rank how do you get to the Doctor if you walk	Alaharo ny fomba fandehanana mandeha any amin'ny Dokotera raha mandeha tongotra
1002.058/doc_walk_rank_often	1002.058	doc_walk_rank_often	Walk very often	Mandeha tongotra tena matetika
1002.059/doc_walk_rank_rare	1002.059	doc_walk_rank_rare	Walk rarely	Mandeha tongotra fa tsy tena matetika
1002.060/doc_walk_rank_never	1002.060	doc_walk_rank_never	Never walk	Tsy mandeha tongotra mihintsy
1002.061/doc_car_rank	1002.061	doc_car_rank	Rank how do to you get the the Doctor if you take a car	Alaharo ny fomba fandehanana mandeha any amin'ny Dokotera raha mandeha fiara
1002.062/doc_car_rank_often	1002.062	doc_car_rank_often	Take a car very often	Mandeha fiara tena matetika
1002.063/doc_car_rank_rare	1002.063	doc_car_rank_rare	Take a car rarely	Mandeha fiara fa tsy tena matetika
1002.064/doc_car_rank_never	1002.064	doc_car_rank_never	Never take a car	Tsy mandeha fiara mihintsy
1002.065/doc_moto_rank	1002.065	doc_moto_rank	Rank how do you get to the Doctor if you ride a moto	Alaharo ny fomba fandehanana mandeha any amin'ny Dokotera raha mandeha moto
1002.066/doc_moto_rank_often	1002.066	doc_moto_rank_often	Ride a moto very often	Mandeha moto tena matetika
1002.067/doc_moto_rank_rare	1002.067	doc_moto_rank_rare	Ride a moto rarely	Mandeha moto fa tsy tena matetika
1002.068/doc_moto_rank_never	1002.068	doc_moto_rank_never	Never ride a moto	Tsy mandeha moto mihintsy
1002.069/doc_boat_rank	1002.069	doc_boat_rank	Rank how do you get to the Doctor if you take a boat	Alaharo ny fomba fandehanana mandeha any amin'ny Dokotera raha mandeha lakana
1002.070/doc_boat_rank_often	1002.070	doc_boat_rank_often	Take a boat very often	Mandeha lakana tena matetika
1002.071/doc_boat_rank_rare	1002.071	doc_boat_rank_rare	Take a boat rarely	Mandeha lakana fa tsy tena matetika
1002.072/doc_boat_rank_never	1002.072	doc_boat_rank_never	Never take a boat	Tsy mandeha lakana mihintsy
2.4: Means of transportation to get to a pharmacy			2.4: Means of transportation to get to a pharmacy	2.4: Fomba fandehanana mankany amin'ny farmasia
1002.073/pharm_walk	1002.073	pharm_walk	Walk?	Misy mandeha tongotra?
1002.074/pharm_walk_hours	1002.074	pharm_walk_hours	How many hour(s) to get there on foot?	Adiny firy raha mandeha tongotra?
1002.075/pharm_car	1002.075	pharm_car	Car?	Misy mandeha fiara?
1002.076/pharm_car_hours	1002.076	pharm_car_hours	How many hour(s) to get there by car?	Adiny firy raha mandeha fiara?
1002.077/pharm_boat	1002.077	pharm_boat	Boat?	Misy mandeha lakana?
1002.078/pharm_boat_hours	1002.078	pharm_boat_hours	How many hour(s) to get there by boat?	Adiny firy raha mandeha lakana?
1002.079/pharm_moto	1002.079	pharm_moto	Moto?	Misy mandeha moto?
1002.080/pharm_moto_hours	1002.080	pharm_moto_hours	How many hour(s) to get there by moto?	Adiny firy raha mandeha moto?
1002.081/pharm_walk_rank	1002.081	pharm_walk_rank	Rank how do you get to the Pharmacy if you walk	Alaharo ny fomba fandehanana mandeha any amin'ny farmasia raha mandeha tongotra
1002.082/pharm_walk_rank_often	1002.082	pharm_walk_rank_often	Walk very often	Mandeha tongotra tena matetika
1002.083/pharm_walk_rank_rare	1002.083	pharm_walk_rank_rare	Walk rarely	Mandeha tongotra fa tsy tena matetika
1002.084/pharm_walk_rank_never	1002.084	pharm_walk_rank_never	Never walk	Tsy mandeha tongotra mihintsy
1002.085/pharm_car_rank	1002.085	pharm_car_rank	Rank how do you get the the Pharmacy if you take a car	Alaharo ny fomba fandehanana mandeha any amin'ny farmasia raha mandeha fiara
1002.086/pharm_car_rank_often	1002.086	pharm_car_rank_often	Take a car very often	Mandeha fiara tena matetika
1002.087/pharm_car_rank_rare	1002.087	pharm_car_rank_rare	Take a car rarely	Mandeha fiara fa tsy tena matetika
1002.088/pharm_car_rank_never	1002.088	pharm_car_rank_never	Never take a car	Tsy mandeha fiara mihintsy
1002.089/pharm_moto_rank	1002.089	pharm_moto_rank	Rank how do you get to the Pharmacy if you ride a moto	Alaharo ny fomba fandehanana mandeha any amin'ny farmasia raha mandeha moto
1002.090/pharm_moto_rank_often	1002.090	pharm_moto_rank_often	Ride a moto very often	Mandeha moto tena matetika
1002.091/pharm_moto_rank_rare	1002.091	pharm_moto_rank_rare	Ride a moto rarely	Mandeha moto fa tsy tena matetika
1002.092/pharm_moto_rank_never	1002.092	pharm_moto_rank_never	Never ride a moto	Tsy mandeha moto mihintsy
1002.093/pharm_boat_rank	1002.093	pharm_boat_rank	Rank how do you get to the Pharmacy if you take a boat	Alaharo ny fomba fandehanana mandeha any amin'ny farmasia raha mandeha lakana
1002.094/pharm_boat_rank_often	1002.094	pharm_boat_rank_often	Take a boat very often	Mandeha lakana tena matetika
1002.095/pharm_boat_rank_rare	1002.095	pharm_boat_rank_rare	Take a boat rarely	Mandeha lakana fa tsy tena matetika
1002.096/pharm_boat_rank_never	1002.096	pharm_boat_rank_never	Never take a boat	Tsy mandeha lakana mihintsy
2.5: Means of transportation to get to a EPP			2.5: Means of transportation to get to a EPP	2.5: Fomba fandehanana mankany amin'ny EPP
1002.097/epp_walk	1002.097	epp_walk	Walk?	Misy mandeha tongotra?
1002.098/epp_walk_hours	1002.098	epp_walk_hours	How many hour(s) to get there on foot?	Adiny firy raha mandeha tongotra?
1002.099/epp_car	1002.099	epp_car	Car?	Misy mandeha fiara?
1002.100/epp_car_hours	1002.100	epp_car_hours	How many hour(s) to get there by car?	Adiny firy raha mandeha fiara?
1002.101/epp_boat	1002.101	epp_boat	Boat?	Misy mandeha lakana?
1002.102/epp_boat_hours	1002.102	epp_boat_hours	How many hour(s) to get there by boat?	Adiny firy raha mandeha lakana?
1002.103/epp_moto	1002.103	epp_moto	Moto?	Misy mandeha moto?
1002.104/epp_moto_hours	1002.104	epp_moto_hours	How many hour(s) to get there by moto?	Adiny firy raha mandeha moto?
1002.105/epp_walk_rank	1002.105	epp_walk_rank	Rank how do you get to the EPP if you walk	Alaharo ny fomba fandehanana mandeha any amin'ny EPP raha mandeha tongotra
1002.106/epp_walk_rank_often	1002.106	epp_walk_rank_often	Walk very often	Mandeha tongotra tena matetika
1002.107/epp_walk_rank_rare	1002.107	epp_walk_rank_rare	Walk rarely	Mandeha tongotra fa tsy tena matetika
1002.108/epp_walk_rank_never	1002.108	epp_walk_rank_never	Never walk	Tsy mandeha tongotra mihintsy
1002.109/epp_car_rank	1002.109	epp_car_rank	Rank how do you get the the EPPI if you take a car	Alaharo ny fomba fandehanana mandeha any amin'ny EPP raha mandeha fiara
1002.110/epp_car_rank_often	1002.110	epp_car_rank_often	Take a car very often	Mandeha fiara tena matetika
1002.111/epp_car_rank_rare	1002.111	epp_car_rank_rare	Take a car rarely	Mandeha fiara fa tsy tena matetika
1002.112/epp_car_rank_never	1002.112	epp_car_rank_never	Never take a car	Tsy mandeha fiara mihintsy
1002.113/epp_moto_rank	1002.113	epp_moto_rank	Rank how do you get to the EPP if you ride a moto	Alaharo ny fomba fandehanana mandeha any amin'ny EPP raha mandeha moto
1002.114/epp_moto_rank_often	1002.114	epp_moto_rank_often	Ride a moto very often	Mandeha moto tena matetika
1002.115/epp_moto_rank_rare	1002.115	epp_moto_rank_rare	Ride a moto rarely	Mandeha moto fa tsy tena matetika
1002.116/epp_moto_rank_never	1002.116	epp_moto_rank_never	Never ride a moto	Tsy mandeha moto mihintsy
1002.117/epp_boat_rank	1002.117	epp_boat_rank	Rank how do you get to the EPP if you take a boat	Alaharo ny fomba fandehanana mandeha any amin'ny EPP raha mandeha lakana
1002.118/epp_boat_rank_often	1002.118	epp_boat_rank_often	Take a boat very often	Mandeha lakana tena matetika
1002.119/epp_boat_rank_rare	1002.119	epp_boat_rank_rare	Take a boat rarely	Mandeha lakana fa tsy tena matetika
1002.120/epp_boat_rank_never	1002.120	epp_boat_rank_never	Never take a boat	Tsy mandeha lakana mihintsy
2.6: Means of transportation to get to a CEG			2.6: Means of transportation to get to a CEG	2.6: Fomba fandehanana mankany amin'ny CEG
1002.121/ceg_walk	1002.121	ceg_walk	Walk?	Misy mandeha tongotra?
1002.122/ceg_walk_hours	1002.122	ceg_walk_hours	How many hour(s) to get there on foot?	Adiny firy raha mandeha tongotra?
1002.123/ceg_car	1002.123	ceg_car	Car?	Misy mandeha fiara?
1002.124/ceg_car_hours	1002.124	ceg_car_hours	How many hour(s) to get there by car?	Adiny firy raha mandeha fiara?
1002.125/ceg_boat	1002.125	ceg_boat	Boat?	Misy mandeha lakana?
1002.126/ceg_boat_hours	1002.126	ceg_boat_hours	How many hour(s) to get there by boat?	Adiny firy raha mandeha lakana?
1002.127/ceg_moto	1002.127	ceg_moto	Moto?	Misy mandeha moto?
1002.128/ceg_moto_hours	1002.128	ceg_moto_hours	How many hour(s) to get there by moto?	Adiny firy raha mandeha moto?
1002.129/ceg_walk_rank	1002.129	ceg_walk_rank	Rank how do you get to the CEG if you walk	Alaharo ny fomba fandehanana mandeha any amin'ny CEG raha mandeha tongotra
1002.130/ceg_walk_rank_often	1002.130	ceg_walk_rank_often	Walk very often	Mandeha tongotra tena matetika
1002.131/ceg_walk_rank_rare	1002.131	ceg_walk_rank_rare	Walk rarely	Mandeha tongotra fa tsy tena matetika
1002.132/ceg_walk_rank_never	1002.132	ceg_walk_rank_never	Never walk	Tsy mandeha tongotra mihintsy
1002.133/ceg_car_rank	1002.133	ceg_car_rank	Rank how do you get the the CEG if you take a car	Alaharo ny fomba fandehanana mandeha any amin'ny CEG raha mandeha fiara
1002.134/ceg_car_rank_often	1002.134	ceg_car_rank_often	Take a car very often	Mandeha fiara tena matetika
1002.135/ceg_car_rank_rare	1002.135	ceg_car_rank_rare	Take a car rarely	Mandeha fiara fa tsy tena matetika
1002.136/ceg_car_rank_never	1002.136	ceg_car_rank_never	Never take a car	Tsy mandeha fiara mihintsy
1002.137/ceg_moto_rank	1002.137	ceg_moto_rank	Rank how do you get to the CEG if you ride a moto	Alaharo ny fomba fandehanana mandeha any amin'ny CEG raha mandeha moto
1002.138/ceg_moto_rank_often	1002.138	ceg_moto_rank_often	Ride a moto very often	Mandeha moto tena matetika
1002.139/ceg_moto_rank_rare	1002.139	ceg_moto_rank_rare	Ride a moto rarely	Mandeha moto fa tsy tena matetika
1002.140/ceg_moto_rank_never	1002.140	ceg_moto_rank_never	Never ride a moto	Tsy mandeha moto mihintsy
1002.141/ceg_boat_rank	1002.141	ceg_boat_rank	Rank how do you get to the CEG if you take a boat	Alaharo ny fomba fandehanana mandeha any amin'ny CEG raha mandeha lakana
1002.142/ceg_boat_rank_often	1002.142	ceg_boat_rank_often	Take a boat very often	Mandeha lakana tena matetika
1002.143/ceg_boat_rank_rare	1002.143	ceg_boat_rank_rare	Take a boat rarely	Mandeha lakana fa tsy tena matetika
1002.144/ceg_boat_rank_never	1002.144	ceg_boat_rank_never	Never take a boat	Tsy mandeha lakana mihintsy
2.7: Means of transportation to get to a Lycee			2.7: Means of transportation to get to a Lycee	2.7: Fomba fandehanana mankany amin'ny Lycee
1002.145/lyc_walk	1002.145	lyc_walk	Walk?	Misy mandeha tongotra?
1002.146/lyc_walk_hours	1002.146	lyc_walk_hours	How many hour(s) to get there on foot?	Adiny firy raha mandeha tongotra?
1002.147/lyc_car	1002.147	lyc_car	Car?	Misy mandeha fiara?
1002.148/lyc_car_hours	1002.148	lyc_car_hours	How many hour(s) to get there by car?	Adiny firy raha mandeha fiara?
1002.149/lyc_boat	1002.149	lyc_boat	Boat?	Misy mandeha lakana?
1002.150/lyc_boat_hours	1002.150	lyc_boat_hours	How many hour(s) to get there by boat?	Adiny firy raha mandeha lakana?
1002.151/lyc_moto	1002.151	lyc_moto	Moto?	Misy mandeha moto?
1002.152/lyc_moto_hours	1002.152	lyc_moto_hours	How many hour(s) to get there by moto?	Adiny firy raha mandeha moto?
1002.153/lyc_walk_rank	1002.153	lyc_walk_rank	Rank how do you get to the Lycee if you walk	Alaharo ny fomba fandehanana mandeha any amin'ny Lycee raha mandeha tongotra
1002.154/lyc_walk_rank_often	1002.154	lyc_walk_rank_often	Walk very often	Mandeha tongotra tena matetika
1002.155/lyc_walk_rank_rare	1002.155	lyc_walk_rank_rare	Walk rarely	Mandeha tongotra fa tsy tena matetika
1002.156/lyc_walk_rank_never	1002.156	lyc_walk_rank_never	Never walk	Tsy mandeha tongotra mihintsy
1002.157/lyc_car_rank	1002.157	lyc_car_rank	Rank how do to you get the the Lycee if you take a car	Alaharo ny fomba fandehanana mandeha any amin'ny Lycee raha mandeha fiara
1002.158/lyc_car_rank_often	1002.158	lyc_car_rank_often	Take a car very often	Mandeha fiara tena matetika
1002.159/lyc_car_rank_rare	1002.159	lyc_car_rank_rare	Take a car rarely	Mandeha fiara fa tsy tena matetika
1002.160/lyc_car_rank_never	1002.160	lyc_car_rank_never	Never take a car	Tsy mandeha fiara mihintsy
1002.161/lyc_moto_rank	1002.161	lyc_moto_rank	Rank how do you get to the Lycee if you ride a moto	Alaharo ny fomba fandehanana mandeha any amin'ny Lycee raha mandeha moto
1002.162/lyc_moto_rank_often	1002.162	lyc_moto_rank_often	Ride a moto very often	Mandeha moto tena matetika
1002.163/lyc_moto_rank_rare	1002.163	lyc_moto_rank_rare	Ride a moto rarely	Mandeha moto fa tsy tena matetika
1002.164/lyc_moto_rank_never	1002.164	lyc_moto_rank_never	Never ride a moto	Tsy mandeha moto mihintsy
1002.165/lyc_boat_rank	1002.165	lyc_boat_rank	Rank how do you get to the Lycee if you take a boat	Alaharo ny fomba fandehanana mandeha any amin'ny Lycee raha mandeha lakana
1002.166/lyc_boat_rank_often	1002.166	lyc_boat_rank_often	Take a boat very often	Mandeha lakana tena matetika
1002.167/lyc_boat_rank_rare	1002.167	lyc_boat_rank_rare	Take a boat rarely	Mandeha lakana fa tsy tena matetika
1002.168/lyc_boat_rank_never	1002.168	lyc_boat_rank_never	Never take a boat	Tsy mandeha lakana mihintsy
2.8: Means of transportation to get to a market (bazary)			2.8: Means of transportation to get to a market (bazary)	2.8: Fomba fandehanana mankany amin'ny Bazary
1002.169/market_walk	1002.169	market_walk	Walk?	Misy mandeha tongotra?
1002.170/market_walk_hours	1002.170	market_walk_hours	How many hour(s) to get there on foot?	Adiny firy raha mandeha tongotra?
1002.171/market_car	1002.171	market_car	Car?	Misy mandeha fiara?
1002.172/market_car_hours	1002.172	market_car_hours	How many hour(s) to get there by car?	Adiny firy raha mandeha fiara?
1002.173/market_boat	1002.173	market_boat	Boat?	Misy mandeha lakana?
1002.174/market_boat_hours	1002.174	market_boat_hours	How many hour(s) to get there by boat?	Adiny firy raha mandeha lakana?
1002.175/market_moto	1002.175	market_moto	Moto?	Misy mandeha moto?
1002.176/market_moto_hours	1002.176	market_moto_hours	How many hour(s) to get there by moto?	Adiny firy raha mandeha moto?
1002.177/market_walk_rank	1002.177	market_walk_rank	Rank how do you get to the Market (Bazary) if you walk	Alaharo ny fomba fandehanana mandeha any amin'ny Bazary raha mandeha tongotra
1002.178/market_walk_rank_often	1002.178	market_walk_rank_often	Walk very often	Mandeha tongotra tena matetika
1002.179/market_walk_rank_rare	1002.179	market_walk_rank_rare	Walk rarely	Mandeha tongotra fa tsy tena matetika
1002.180/market_walk_rank_never	1002.180	market_walk_rank_never	Never walk	Tsy mandeha tongotra mihintsy
1002.181/market_car_rank	1002.181	market_car_rank	Rank how do you get the the Market (Bazary) if you take a car	Alaharo ny fomba fandehanana mandeha any amin'ny Bazary raha mandeha fiara
1002.182/market_car_rank_often	1002.182	market_car_rank_often	Take a car very often	Mandeha fiara tena matetika
1002.183/market_car_rank_rare	1002.183	market_car_rank_rare	Take a car rarely	Mandeha fiara fa tsy tena matetika
1002.184/market_car_rank_never	1002.184	market_car_rank_never	Never take a car	Tsy mandeha fiara mihintsy
1002.185/market_moto_rank	1002.185	market_moto_rank	Rank how do you get to the Market (Bazary) if you ride a moto	Alaharo ny fomba fandehanana mandeha any amin'ny Bazary raha mandeha moto
1002.186/market_moto_rank_often	1002.186	market_moto_rank_often	Ride a moto very often	Mandeha moto tena matetika
1002.187/market_moto_rank_rare	1002.187	market_moto_rank_rare	Ride a moto rarely	Mandeha moto fa tsy tena matetika
1002.188/market_moto_rank_never	1002.188	market_moto_rank_never	Never ride a moto	Tsy mandeha moto mihintsy
1002.189/market_boat_rank	1002.189	market_boat_rank	Rank how do you get to the Market (Bazary) if you take a boat	Alaharo ny fomba fandehanana mandeha any amin'ny Bazary raha mandeha lakana
1002.190/market_boat_rank_often	1002.190	market_boat_rank_often	Take a boat very often	Mandeha lakana tena matetika
1002.191/market_boat_rank_rare	1002.191	market_boat_rank_rare	Take a boat rarely	Mandeha lakana fa tsy tena matetika
1002.192/market_boat_rank_never	1002.192	market_boat_rank_never	Never take a boat	Tsy mandeha lakana mihintsy
Section 03: Market and Epicerie - Where we can find the following items?			Section 03: Market and Epicerie - Where we can find the following items?	Section 03: Marchés et EPICERIE - Aiza no toerana ahitana ireto zavatra maraka ireto?
1003.001/intro_q	1003.001	intro_q	Where can we find the following items?	Aiza no toerana ahitana ireto zavatra maraka ireto?
1003.002/cereals	1003.002	cereals	CEREALS	CEREALES
1003.003/rice_loc	1003.003	rice_loc	Husked rice local	Riz décortiqué local
1003.004/rice_loc_kg	1003.004	rice_loc_kg	How much for one KG?	Otrinona ny kilao?
1003.005/rice_loc_cup	1003.005	rice_loc_cup	How much for one cup?	Otrinona ny kapoka?
1003.006/ric_loc_bunch	1003.006	ric_loc_bunch	How much for one bunch?	Otrinona ny tokony?
1003.007/rice_imp	1003.007	rice_imp	Husked rice imported	Riz décortiqué importé
1003.008/rice_imp_kg	1003.008	rice_imp_kg	How much for one KG?	Otrinona ny kilao?
1003.009/rice_imp_cup	1003.009	rice_imp_cup	How much for one cup?	Otrinona ny kapoka?
1003.010/NA_imprice_bunch	1003.010	NA_imprice_bunch	(Null, not applicable question): How much per bunch of rice? (Question omitted from versions R2V, R3V, R5V)	Otrinona ny tokony?
1003.011/rice_paddy	1003.011	rice_paddy	Paddy	Paddy
1003.012/rice_paddy_kg	1003.012	rice_paddy_kg	How much for one KG?	Otrinona ny kilao?
1003.013/rice_paddy_kg	1003.013	rice_paddy_kg	How much for one cup?	Otrinona ny kapoka?
1003.014/NA_padrice_bunch	1003.014	NA_padrice_bunch	(Null, not applicable question): How much per bunch of rice? (Question omitted from versions R2V, R3V, R5V)	Otrinona ny tokony?
1003.015/corn	1003.015	corn	Corn	Maïs
1003.016/corn_kg	1003.016	corn_kg	How much for one KG?	Otrinona ny kilao?
1003.017/corn_cup	1003.017	corn_cup	How much for one cup?	Otrinona ny kapoka?
1003.018/NA_corn_bunch	1003.018	NA_corn_bunch	(Null, not applicable question): How much per bunch of corn? (Question omitted from versions R2V, R3V, R5V)	Otrinona ny tokony?
1003.019/flours	1003.019	flours	FLOURS	FARINES
1003.020/flour_rice	1003.020	flour_rice	Rice flour	Farine de riz
1003.021/flour_rice_kg	1003.021	flour_rice_kg	How much for one KG?	Otrinona ny kilao?
1003.022/flour_rice_cup	1003.022	flour_rice_cup	How much for one cup?	Otrinona ny kapoka?
1003.023/flour_rice_bunch	1003.023	flour_rice_bunch	How much for one bunch?	Otrinona ny tokony?
1003.024/flour_cassava	1003.024	flour_cassava	Cassava flour	Farine de manioc
1003.025/flour_cassava_kg	1003.025	flour_cassava_kg	How much for one KG?	Otrinona ny kilao?
1003.026/flour_cassava_cup	1003.026	flour_cassava_cup	How much for one cup?	Otrinona ny kapoka?
1003.027/flour_cassava_bunch	1003.027	flour_cassava_bunch	How much for one bunch?	Otrinona ny tokony?
1003.028/tubers	1003.028	tubers	TUBERS	TUBERCULES
1003.029/cassava_gr	1003.029	cassava_gr	Green cassava	Manioc vert
1003.030/cassava_gr_kg	1003.030	cassava_gr_kg	How much for one KG?	Otrinona ny kilao?
1003.031/cassava_gr_bunch	1003.031	cassava_gr_bunch	How much for one bunch?	Otrinona ny tokony?
1003.032/sw_potato	1003.032	sw_potato	Sweet potatoes	Patate douces
1003.033/sw_potato_kg	1003.033	sw_potato_kg	How much for one KG?	Otrinona ny kilao?
1003.034/sw_potato_bunch	1003.034	sw_potato_bunch	How much for one bunch?	Otrinona ny tokony?
1003.035/yam	1003.035	yam	Wild yam	Ovy ala
1003.036/yam_kg	1003.036	yam_kg	How much for one KG?	Otrinona ny kilao?
1003.037/yam_bunch	1003.037	yam_bunch	How much for one bunch?	Otrinona ny tokony?
1003.038/dry_legumes	1003.038	dry_legumes	DRY LEGUMES	LEGUMINEUSES SECHES
1003.039/beans_dry	1003.039	beans_dry	Dry beans	Haricots secs
1003.040/beans_dry_kg	1003.040	beans_dry_kg	How much for one KG?	Otrinona ny kilao?
1003.041/beans_dry_cup	1003.041	beans_dry_cup	How much for one cup?	Otrinona ny kapoka?
1003.042/beans_dry_bunch	1003.042	beans_dry_bunch	How much for one bunch?	Otrinona ny tokony?
1003.043/kabaro	1003.043	kabaro	Lima bean (kabaro)	Poids de cap (kabaro)
1003.044/kabaro_kg	1003.044	kabaro_kg	How much for one KG?	Otrinona ny kilao?
1003.045/kabaro_cup	1003.045	kabaro_cup	How much for one cup?	Otrinona ny kapoka?
1003.046/kabaro_bunch	1003.046	kabaro_bunch	How much for one bunch?	Otrinona ny tokony?
1003.047/voanjob_lentils	1003.047	voanjob_lentils	Voanjobory/lentils	Voanjobory/lentilles
1003.048/voanjob_lentils_kg	1003.048	voanjob_lentils_kg	How much for one KG?	Otrinona ny kilao?
1003.049/voanjob_lentils_cup	1003.049	voanjob_lentils_cup	How much for one cup?	Otrinona ny kapoka?
1003.050/voanjob_lentils_bunch	1003.050	voanjob_lentils_bunch	How much for one bunch?	Otrinona ny tokony?
1003.051/other_veg_dry	1003.051	other_veg_dry	Other dry vegetable and pulses pulses (vaomaina hafa)	Autres légumineuses sèches (vaomaina hafa)
1003.052/other_veg_dry_kg	1003.052	other_veg_dry_kg	How much for one KG?	Otrinona ny kilao?
1003.053/other_veg_dry_cup	1003.053	other_veg_dry_cup	How much for one cup?	Otrinona ny kapoka?
1003.054/other_veg_dry_bunch	1003.054	other_veg_dry_bunch	How much for one bunch?	Otrinona ny tokony?
1003.055/fruits	1003.055	fruits	FRUITS	FRUITS
1003.056/banana	1003.056	banana	Banana	Banana
1003.057/banana_kg	1003.057	banana_kg	How much for one KG?	Otrinona ny kilao?
1003.058/banana_bunch	1003.058	banana_bunch	How much for one bunch?	Otrinona ny tokony?
1003.059/papaya	1003.059	papaya	Papaya	Papaye
1003.060/papaya_kg	1003.060	papaya_kg	How much for one KG?	Otrinona ny kilao?
1003.061/papaya_bunch	1003.061	papaya_bunch	How much for one bunch?	Otrinona ny tokony?
1003.062/lychee	1003.062	lychee	Lychees	Letchis
1003.063/lychee_kg	1003.063	lychee_kg	How much for one KG or basket (garaba)?	Otrinona ny kilao na garaba?
1003.064/lychee_bunch	1003.064	lychee_bunch	How much for one bunch?	Otrinona ny tokony?
1003.065/banana	1003.065	banana	Dry fruit	Fruits séchés
1003.066/banana_kg	1003.066	banana_kg	How much for one KG?	Otrinona ny kilao?
1003.067/banana_bunch	1003.067	banana_bunch	How much for one bunch?	Otrinona ny tokony?
1003.068/avo	1003.068	avo	Avocado	Avocat
1003.069/avo_kg	1003.069	avo_kg	How much for one KG?	Otrinona ny kilao?
1003.070/avo_bunch	1003.070	avo_bunch	How much for one bunch?	Otrinona ny tokony?
1003.071/coco	1003.071	coco	Coconut	Coco
1003.072/coco_kg	1003.072	coco_kg	How much for one KG?	Otrinona ny kilao?
1003.073/coco_bunch	1003.073	coco_bunch	How much for one bunch?	Otrinona ny tokony?
1003.074/veg_and_greens	1003.074	veg_and_greens	VEGETABLES AND GREENS	LEGUMES
1003.075/greens	1003.075	greens	Greens	Anana
1003.076/greens_toko	1003.076	greens_toko	How much for one toko?	Otrinona ny toko?
1003.077/greens_cup	1003.077	greens_cup	How much for one cup?	Otrinona ny kapoka?
1003.078/greens_bunch	1003.078	greens_bunch	How much for one bunch?	Otrinona ny tokony?
1003.079/onions	1003.079	onions	Onions	Oignons
1003.080/onions_kg	1003.080	onions_kg	How much for one KG?	Otrinona ny kilao?
1003.081/onions_cups	1003.081	onions_cups	How much for one cup?	Otrinona ny kapoka?
1003.082/onions_bunch	1003.082	onions_bunch	How much for one bunch?	Otrinona ny tokony?
1003.083/tomato	1003.083	tomato	Tomatoes	Tomates
1003.084/tomato_kg	1003.084	tomato_kg	How much for one KG?	Otrinona ny kilao?
1003.085/tomato_cups	1003.085	tomato_cups	How much for one cup?	Otrinona ny kapoka?
1003.086/tomato_bunch	1003.086	tomato_bunch	How much for one bunch?	Otrinona ny tokony?
1003.087/carrot	1003.087	carrot	Carrot	Karoty
1003.088/carrot_kg	1003.088	carrot_kg	How much for one KG?	Otrinona ny kilao?
1003.089/carrot_cups	1003.089	carrot_cups	How much for one cup?	Otrinona ny kapoka?
1003.090/carrot_bunch	1003.090	carrot_bunch	How much for one bunch?	Otrinona ny tokony?
1003.091/other_veg	1003.091	other_veg	Other vegetables and greens	Autres
1003.092/other_veg_kg	1003.092	other_veg_kg	How much for one KG?	Otrinona ny kilao?
1003.093/other_veg_cups	1003.093	other_veg_cups	How much for one cup?	Otrinona ny kapoka?
1003.094/other_veg_bunch	1003.094	other_veg_bunch	How much for one bunch?	Otrinona ny tokony?
1003.095/meats	1003.095	meats	MEAT-FISH-POULTRY	VIANDES-POISSONS-VOLAILLES
1003.096/beef	1003.096	beef	Zebu (beef) meat	Viande de bœuf
1003.097/beef_kg	1003.097	beef_kg	How much for one KG?	Otrinona ny kilao?
1003.098/mutton	1003.098	mutton	Mutton meat	Viande de mouton
1003.099/mutton_kg	1003.099	mutton_kg	How much for one KG?	Otrinona ny kilao?
1003.100/goat	1003.100	goat	Goat meat	Viande de chèvre
1003.101/goat_kg	1003.101	goat_kg	How much for one KG?	Otrinona ny kilao?
1003.102/pork	1003.102	pork	Pork meat	Viande de porc
1003.103/pork_kg	1003.103	pork_kg	How much for one KG?	Otrinona ny kilao?
1003.104/chicken	1003.104	chicken	Chicken meat	Poulet
1003.105/chicken_kg	1003.105	chicken_kg	How much for one KG?	Otrinona ny kilao?
1003.106/other_poultry	1003.106	other_poultry	Other poultry meat	Autres volailles
1003.107/other_poultry_kg	1003.107	other_poultry_kg	How much for one KG?	Otrinona ny kilao?
1003.108/fish	1003.108	fish	Fresh fish, frozen fish	Poissons frais, congelés
1003.109/fish_kg	1003.109	fish_kg	How much for one KG?	Otrinona ny kilao?
1003.110/shellfish	1003.110	shellfish	Shellfish and Crustaceans	Crustacés
1003.111/shellfish_kg	1003.111	shellfish_kg	How much for one KG?	Otrinona ny kilao?
1003.112/offal	1003.112	offal	Produits d'abat (offal and organs)	Produits d'abat
1003.113/offal_kg	1003.113	offal_kg	How much for one KG?	Otrinona ny kilao?
1003.114/dry_fish	1003.114	dry_fish	Dry or smoked fish	Poissons séchés ou fumés
1003.115/dry_fish_kg	1003.115	dry_fish_kg	How much for one KG?	Otrinona ny kilao?
1003.116/other_meat	1003.116	other_meat	Other meat	Autres viandes
1003.117/other_meat_kg	1003.117	other_meat_kg	How much for one KG?	Otrinona ny kilao?
1003.118/farm_products	1003.118	farm_products	FARM PRODUCTS	PRODUITS D'ELEVAGE
1003.119/egg	1003.119	egg	Egg	Œuf
1003.120/egg_unit	1003.120	egg_unit	How much for one?	Otrinona ny iray?
1003.121/honey	1003.121	honey	Honey (Tantely)	Miel (Tantely)
1003.122/honey_liter	1003.122	honey_liter	How much for one liter?	Otrinona ny iray litatra?
1003.123/milk	1003.123	milk	Milk	Lait
1003.124/milk_liter	1003.124	milk_liter	How much for one liter?	Otrinona ny iray litatra?
1003.125/other_milk	1003.125	other_milk	Other milk	Autres lait
1003.126/other_milk_liter	1003.126	other_milk_liter	How much for one liter?	Otrinona ny iray litatra?
1003.127/oils_fats	1003.127	oils_fats	OILS-FATS	HUILES/GRAISSE
1003.128/oil	1003.128	oil	Oil	Huiles (Menaka)
1003.129/oil_liter	1003.129	oil_liter	How much for one liter?	Otrinona ny iray litatra?
1003.130/margarine	1003.130	margarine	Margarine	Margarine
1003.131/margarine_unit	1003.131	margarine_unit	How much for one?	Otrinona no iray?
1003.132/sugars	1003.132	sugars	SUGAR	SUCRE
1003.133/sugar_industrial	1003.133	sugar_industrial	Industrial sugar	Sucre industriel
1003.134/sugar_kg	1003.134	sugar_kg	How much for one KG?	Otrinona ny kilao?
1003.135/sugar_gasy	1003.135	sugar_gasy	Malagasy sugar	Sucre gasy
1003.136/sugar_	1003.136	sugar_	How much for one KG?	Otrinona ny kilao?
1003.137/produits_finis	1003.137	produits_finis	PRODUITS FINIS	PRODUITS FINIS
1003.138/bread	1003.138	bread	Bread	Pains
1003.139/bread_unit	1003.139	bread_unit	How much for one?	Otrinona no iray?
1003.140/beignet	1003.140	beignet	Beignet (mofo gasy, menakely, sns)	Beignet (mofo gasy, menakely, sns)
1003.141/beignet_unit	1003.141	beignet_unit	How much for one?	Otrinona no iray?
1003.142/viennoiserie	1003.142	viennoiserie	Viennoiserie	Viennoiserie
1003.143/viennoiserie_unit	1003.143	viennoiserie_unit	How much for one?	Otrinona ny iray?
1003.144/coffee	1003.144	coffee	Coffee	Cafe
1003.145/coffee_cup	1003.145	coffee_cup	How much for one cup?	Otrinona ny iray kapoaka?
1003.146/noodles	1003.146	noodles	Noodles, sedap sns	Pate sedap, apollo, indomie,sns
1003.147/noodles_unit	1003.147	noodles_unit	How much for one?	Otrinona no iray?
1003.148/dairy	1003.148	dairy	DAIRY PRODUCTS	PRODUITS LAITIERS
1003.149/butter	1003.149	butter	Butter	Beurre
1003.150/butter_unit	1003.150	butter_unit	How much for one?	Otrinona ny iray?
1003.151/yogurt	1003.151	yogurt	Yogurt	Yaourt
1003.152/yogurt_unit	1003.152	yogurt_unit	How much for one?	Otrinona ny iray?
1003.153/cheese	1003.153	cheese	Cheese	Fromage
1003.154/cheese_100_grams	1003.154	cheese_100_grams	How much for 100 grams?	Otrinona ny 100 grammes?
1003.155/other_dairy	1003.155	other_dairy	Other dairy products	Autres produits laitiers (autre que le lait)
1003.156/other_dairy_100_grams	1003.156	other_dairy_100_grams	How much for one 100 grams?	Otrinona ny 100 grammes na iray isa?
Section 04: Electricity	1003.157		Section 04: Electricity	Section 04: Electricité
1004.001/electricity_prompt	1004.001	electricity_prompt	To understand the use of electricity (not a question, an enumerator prompt only)	Tahan'ny fampiasana herin'aratra
1004.002/electricity_hh_perc	1004.002	electricity_hh_perc	Approximately what percentage of households in the village have electricity?	Mety firy isan-jato (%) eo ny tokantrano manana herin'aratra eto amin'ny tanàna? (99 raha tsy aiko)
1004.003/electricity_prompt2	1004.003	electricity_prompt2	What are the commonly used sources of energy (not a question, an enumerator prompt only)	Alaharo ny karazana herin-aratra tena fampiasa matetika eto?
1004.004/rank_solar	1004.004	rank_solar	Rank the sources of energy that you use the most: Solar	Solaire
1004.005/rank_battery	1004.005	rank_battery	Rank the sources of energy that you use the most: Battery	Batery
1004.006/rank_hydro	1004.006	rank_hydro	Rank the sources of energy that you use the most: JIRAMA (Hydro power)	JIRAMA (Hydro Thermique)
1004.007/rank_other	1004.007	rank_other	Rank the sources of energy that you use the most: Other	Hafa
Section 05: Coping Strategies Index (CSI) Interpretation			Section 05: Coping Strategies Index (CSI) Interpretation	Section 05: Coping Strategies Index (CSI)
1005.001/csi_prompt	1005.001	csi_prompt	If you saw people in a household in this village do the following things, would you think that they were food secure (not suffering), somewhat food insecure (suffering some), food insecure (suffering), or very food insecure (suffering a lot)?	Raha mahita olona tsy ampy sakafo ao amin'ny tokantrano iray ianao ka mety ho sendran'ireto zavatra manaraka ireto mety: (1) Tsy mijaly/tsy maninona; (2) Mijalijaly; (3) Mijaly; (4) Tena mijaly
1005.002/csi_skip_days	1005.002	csi_skip_days	Skip entire days without eating?	Raha tsy ampy sakafo ary misy olona tsy misakafo mandritra ny andro manontolo (tsy misakafo maraina, na antoandro, na hariva) dia …
1005.003/csi_reduce_meal_num	1005.003	csi_reduce_meal_num	Reduce the number of meals eaten in a day?	Raha tsy ampy sakafo ary misy olona mampihena ny isan'ny sakafo hanina (Mety ho sakafo maraina, na sakafo atoandro, na sakafo hariva) anatin'ny iray andro dia…
1005.004/csi_restrict_nonworkers	1005.004	csi_restrict_nonworkers	Restrict consumption by non-workers in order to feed working members of the household?	Raha tsy ampy sakafo ary misy olona mampihena ny sakafo hanin'ireo olona tsy miasa ao an-tokantrano mba hafahan'ireo olona miasa misakafo be be kokoa dia…
1005.005/csi_restrict_children	1005.005	csi_restrict_children	Restrict consumption by children in order for adults to eat?	Raha tsy ampy sakafo ary misy olona mampihena ny sakafo hanin'ireo ankizy (zanaka) amin'izay misakafo be be kokoa ireo olon-dehibe dia…
1005.006/csi_restrict_adults	1005.006	csi_restrict_adults	Restrict consumption by adults in order for small children to eat?	Raha tsy ampy sakafo ary misy olona mampihena ny sakafo hanin'ireo olon-dehibe amin'izay misakafo be be kokoa ny ankizy (zanaka) dia...
1005.007/csi_limit_portions	1005.007	csi_limit_portions	Limit portion size at mealtimes?	Raha tsy ampy sakafo ary misy olona mampihena ny haben'ny sakafo hanin'ny isan-olona ao an-tokantrano dia…
1005.008/csi_send_to_ask	1005.008	csi_send_to_ask	Send household members to beg/ask for food?	Raha tsy ampy sakafo ary misy olona manasa olona anatin'ny ireo tokantrano ireo mba mangataka sakafo an-tranon'olona hafa dia…
1005.009/csi_send_to_others	1005.009	csi_send_to_others	Have household members eat at the house of neighbors or family?	Raha tsy ampy sakafo ary misy olona mandefa ny olona ao an-tokantrano hisakafo any amin'ny olona hafa na fianakaviana na ny mpiray tanàna dia…
1005.010/csi_consume_stock	1005.010	csi_consume_stock	Consume seed stock held for next season?	Raha tsy ampy sakafo ary misy olona mihinana ireo masomboly izay tokony hambolena amin'ny vanim-potoana manaraka dia…
1005.011/csi_harvest_early	1005.011	csi_harvest_early	Harvest immature crops?	Raha tsy ampy sakafo ary misy olona maka ireo vokatra/voly nambolena nefa mbola tsy matoy na masaka dia…
1005.012/csi_hunt	1005.012	csi_hunt	Hunt?	Raha tsy ampy sakafo ary misy olona mandeha mihaza bibidia…
1005.013/csi_gather_wild	1005.013	csi_gather_wild	Gather wild food (oviala, hovotro, na ahany hafa)?	Raha tsy ampy sakafo ary misy olona manangona ireo "sakafodia" toa ny oviala, hovotra, bibikely, sns dia…
1005.014/csi_use_credit	1005.014	csi_use_credit	Purchase food on credit?	Raha tsy ampy sakafo ary misy olona manao trosa amin'ny mpivarotra na mpiara-monina rehefa hividy sakafo dia…
1005.015/csi_borrow	1005.015	csi_borrow	Borrow food, or rely on help from a friend or relative?	Raha tsy ampy sakafo ary misy olona mihindrana sakafo na maka vonjy any amin'ny namana na havana dia…
1005.016/csi_less_quality	1005.016	csi_less_quality	Rely on less preferred and less expensive foods?	Raha tsy ampy sakafo ary misy olona mihinana sakafo tsy dia tiana satria tsy ampy vola dia…
Section 06: Chicken and poultry diseases			Section 06: Chicken and poultry diseases	Section 06: Maladies: poulet/canard
1006.001/chicken_dis_prompt1	1006.001	chicken_dis_prompt1	Enumerator prompt: We will ask about common chicken diseases	"Hanontany karazana aretina akoho aho izay tena matetika mitranga aty aminareo"
1006.002/chicken_dis_prompt2	1006.002	chicken_dis_prompt2	Enumerator prompt: Chicken diseases	Aretin'ny akoho
1006.003/chicken_dis1_name	1006.003	chicken_dis1_name	What is the name of the CHICKEN disease?	Inona no anaran'ilay aretina akoho?
1006.004/chicken_dis1_symptoms	1006.004	chicken_dis1_symptoms	What are the symptoms?	Inona avy ireo famantarana ny fisehon'ilay aretina?
1006.005/chicken_dis1_treat	1006.005	chicken_dis1_treat	How do you treat the disease?	Ahoana ny fomba hitsaboana azy?
1006.006/chicken_dis1_transmit_y_n	1006.006	chicken_dis1_transmit_y_n	Does the disease transmit?	Mifindra ve ny aretina?
1006.007/chicken_dis1_transmit_how	1006.007	chicken_dis1_transmit_how	How does the disease transmit?	Amin'ny fomba ahoana ny fifindran'ilay aretina?
1006.008/chicken_dis1_mos	1006.008	chicken_dis1_mos	When does the disease occur most often? (In which months?)	Oviana no fotoana tena mampisy ny aretina? (Avril, Octobre sa inona?)
1006.009/chicken_dis1_season	1006.009	chicken_dis1_season	More specifically, when does the disease occur most often? In which agricultural seasons?	Ny fotoana tena misy azy, mitovy saison d'agriculture inona? (miambim-pody, manosy, sns)
1006.010/chicken_dis1_dead	1006.010	chicken_dis1_dead	How do you manage/treat chicken that died from being sick?	Raha misy akoho marary ka maty dia atao ahoana?
1006.011/chicken_dis1_dead_other	1006.011	chicken_dis1_dead_other	Other	Hafa
1006.012/chicken_sleep	1006.012	chicken_sleep	Where do chicken sleep?	Aiza ny toerana hatorian'ny akoho?
1006.013/chicken_sleep_other	1006.013	chicken_sleep_other	Other	Hafa
1006.014/chicken_feed	1006.014	chicken_feed	What do chicken eat?	Inona no sakafo fihinany?
1006.015/chicken_feed_other	1006.015	chicken_feed_other	Other	Hafa
1006.016/chicken_num	1006.016	chicken_num	How many chicken do you have at home?	Firy ny isan'ny akohonareo?
1006.017/chicken_owner	1006.017	chicken_owner	Who is the chicken owner?	Iza no tompony akoho ao an-trano?
1006.018/chicken_owner_other	1006.018	chicken_owner_other	Other	Hafa
1006.019/chicken_taboo_perc	1006.019	chicken_taboo_perc	Because of taboo, approximately what percentage of people in this village do not eat chicken?	Noho ny fady, mety firy isan-jato eo ny olona tsy mihinana akoho eto? (999 raha Tsy aiko)
1006.020/chicken_taboo_type_a	1006.020	chicken_taboo_type_a	Because of taboo of tromba and aody, approximately what percentage of people in this village do not eat chicken?	Noho ny fady momban'ny tromba sy aody, mety firy isan-jato eo ny olona tsy mihinana akoho eto? (999 raha tsy aiko)
1006.021/chicken_taboo_type_b	1006.021	chicken_taboo_type_b	Because of taboo told by the ancestors, approximately what percentage of people in this village do not eat chicken?	Noho ny fady nolazain'ireo razambe taloha, mety firy isan-jato eo ny olona tsy mihinana akoho eto? (999 raha tsy aiko)
1006.022/chicken_egg_num	1006.022	chicken_egg_num	Approximately, how many eggs does a chicken lay each time that it lays eggs?	Firy eo eo ny atody hakotriky ny akoho iray isaky ny manatody izy? (999 raha tsy aiko)
1006.023/chicken_egg_yr	1006.023	chicken_egg_yr	Approximately, how many eggs does a chicken lay each year that it lays eggs?	Firy eo eo ny atody hakotriky ny akoho iray mandritra ny taona iray? (999 raha tsy aiko)
1006.024/chicken_hatch_rate	1006.024	chicken_hatch_rate	Approximately, how many of the chicken eggs that are layed on average hatch as live chicks each year?	Firy eo eo ny atody lasa fohy ao anatin'ny taona iray? (999 raha tsy aiko)
1006.025/chicken_lay_rate	1006.025	chicken_lay_rate	How often does a chicken lay eggs?	Isaky ny inona no tena manatody ny akoho iray?
1006.026/chicken_lay_rate_other	1006.026	chicken_lay_rate_other	Other	Hafa
1006.027/fowl_dis_prompt1	1006.027	fowl_dis_prompt1	Enumerator prompt: We will ask about common duck/fowl diseases	"Hanontany karazana aretina vorondrano aho izay tena matetika mitranga aty aminareo"
1006.028/fowl_dis_prompt2	1006.028	fowl_dis_prompt2	Enumerator prompt: Duck/Fowl diseases	Aretin'ny vorondrano
1006.029/fowl_dis1_name	1006.029	fowl_dis1_name	What is the name of the DUCK/FOWL disease?	Inona no anaran'ilay aretina vorondrano?
1006.030/fowl_dis1_symptoms	1006.030	fowl_dis1_symptoms	What are the symptoms?	Inona avy ireo famantarana ny fisehon'ilay aretina?
1006.031/fowl_dis1_treat	1006.031	fowl_dis1_treat	How do you treat the disease?	Ahoana ny fomba hitsaboana azy?
1006.032/fowl_dis1_transmit_y_n	1006.032	fowl_dis1_transmit_y_n	Does the disease transmit?	Mifindra ve ny aretina?
1006.033/fowl_dis1_transmit_how	1006.033	fowl_dis1_transmit_how	How does the disease transmit?	Amin'ny fomba ahoana ny fifindran'ilay aretina?
1006.034/fowl_dis1_mos	1006.034	fowl_dis1_mos	When does the disease occur most often? In which months?	Oviana no fotoana tena mampisy ny aretina? (Avril, Octobre sa inona?)
1006.035/fowl_dis1_season	1006.035	fowl_dis1_season	More specifically, when does the disease occur most often? In which agricultural seasons?	Ny fotoana tena misy azy, mitovy saison d'agriculture inona? (miambim-pody, manosy, sns)
1006.036/fowl_dis1_dead	1006.036	fowl_dis1_dead	How do you manage/treat duck/fowl that died from being sick?	Raha misy vorondrano marary ka maty dia atao ahoana?
1006.037/fowl_dis1_dead_other	1006.037	fowl_dis1_dead_other	Other	Hafa
1006.038/fowl_sleep	1006.038	fowl_sleep	Where do duck/fowl sleep?	Aiza ny toerana hatorian'ny vorondrano?
1006.039/fowl_sleep_other	1006.039	fowl_sleep_other	Other	Hafa
1006.040/fowl_feed	1006.040	fowl_feed	What do duck/fowl eat?	Inona no sakafo fihinany?
1006.041/fowl_feed_other	1006.041	fowl_feed_other	Other	Hafa
1006.042/fowl_num	1006.042	fowl_num	How many duck/fowl do you have at home?	Firy ny isan'ny vorondranonareo?
1006.043/fowl_owner	1006.043	fowl_owner	Who is the duck/fowl owner?	Iza no tompony vorondrano ao an-trano?
1006.044/fowl_owner_other	1006.044	fowl_owner_other	Other	Hafa
1006.045/fowl_taboo_perc	1006.045	fowl_taboo_perc	Because of taboo, approximately what percentage of people in this village do not eat duck/fowl?	Noho ny fady, mety firy isan-jato eo ny olona tsy mihinana vorondrano eto? (999 raha Tsy aiko)
1006.046/fowl_taboo_type_a	1006.046	fowl_taboo_type_a	Because of taboo of tromba and aody, approximately what percentage of people in this village do not eat duck/fowl?	Noho ny fady momban'ny tromba sy aody, mety firy isan-jato eo ny olona tsy mihinana vorondrano eto? (999 raha tsy aiko)
1006.047/fowl_taboo_type_b	1006.047	fowl_taboo_type_b	Because of taboo told by the ancestors, approximately what percentage of people in this village do not eat duck/fowl?	Noho ny fady nolazain'ireo razambe taloha, mety firy isan-jato eo ny olona tsy mihinana vorondrano eto? (999 raha tsy aiko)
1006.048/fowl_egg_num	1006.048	fowl_egg_num	Approximately, how many eggs does a duck/fowl lay each time that it lays eggs?	Firy eo eo ny atody hakotriky ny vorondrano iray isaky ny manatody izy? (999 raha tsy aiko)
1006.049/fowl_egg_yr	1006.049	fowl_egg_yr	Approximately, how many eggs does a duck/fowl lay each year that it lays eggs?	Firy eo eo ny atody hakotriky ny vorondrano iray mandritra ny taona iray? (999 raha tsy aiko)
1006.050/fowl_hatch_rate	1006.050	fowl_hatch_rate	Approximately, how many of the duck/fowl eggs that are layed on average hatch as live chicks each year?	Firy eo eo ny atody lasa fohy ao anatin'ny taona iray? (999 raha tsy aiko)
1006.051/fowl_lay_rate	1006.051	fowl_lay_rate	How often does a duck/fowl lay eggs?	Isaky ny inona no tena manatody ny vorondrano iray?
1006.052/fowl_lay_rate_other	1006.052	fowl_lay_rate_other	Other	Hafa
Section 07: General Questions About Chickens and Ducks			Section 07: General Questions About Chickens and Ducks	Section 07: Questions générales: poulet/canard
1007.001/chicken_kg_cost	1007.001	chicken_kg_cost	How much does one kg of CHICKEN cost?	Mety ohatrinona eo ny vidin'ny akoho iray kilao? (999 raha tsy aiko)
1007.002/price_diff_reason	1007.002	price_diff_reason	Why does the price differ among duck/fowl?	Inona no mahatonga ny vidin'ny vorondrano tsy mitovy?
1007.003/chicken_duck_pref	1007.003	chicken_duck_pref	Do people prefer raising chicken or duck/fowl (all types) more?	Akoho sa vorondrano no tian'olona ompiana kokoa?
1007.004/chicken_over_duck_reason	1007.004	chicken_over_duck_reason	Why do people prefer raising chicken instead of ducks (DRAKIDRAKY etc)?	Inona no antony mahatonga ny olona mifidy miompy akoho noho ny hafa?
1007.005/chicken_vacc_pay	1007.005	chicken_vacc_pay	If there is a vaccine that prevents your chicken from diseases, how much are you willing to pay for it (ARIARY)?	Raha misy vaksiny miaro ny akohonareo, ohatrinona aminy ariary eo eo mety hasahianao (hazakanao) ny vidiny? (ARIARY) (9999 raha tsy aiko)
Section 08: Gender Equality			Section 08: Gender Equality	Section 08: L'égalité des sexes
1008.001/gender_president	1008.001	gender_president	What is the gender of the president (Chief of tanàna) of this village?	Lehilahy sa vehivavy ny president eto amin'ity tanàna ity?
1008.002/gender_vice_president	1008.002	gender_vice_president	What is the gender of the vice-president of this village?	Lehilahy sa vehivavy ny vice-president eto amin'ity tanana ity?
1008.003/num_male_secretrary	1008.003	num_male_secretrary	How many male secretaries?	Sekretera: firy lehilahy? (999 raha tsy aiko)
1008.004/num_female_secretary	1008.004	num_female_secretary	How many female secretaries?	Sekretera: firy vehivavy? (999 raha tsy aiko)
1008.005/num_male_treasurer	1008.005	num_male_treasurer	How many male treasurers?	Mpitahiry vola: firy lehilahy? (999 raha tsy aiko)
1008.006/num_female_treasurer	1008.006	num_female_treasurer	How many female treasurers?	Mpitahiry vola: firy vehivavy? (999 raha tsy aiko)
1008.007/num_male_couns	1008.007	num_male_couns	How many male Counsellors?	Mpanolo-tsaina: firy lehilahy? (999 raha tsy aiko)
1008.008/num_female_couns	1008.008	num_female_couns	How many female Counsellors?	Mpanolo-tsaina: firy vehivavy? (999 raha tsy aiko)
1008.009/num_male_police	1008.009	num_male_police	How many male Police?	Police na quartier mobile: firy lehilahy? (999 raha tsy aiko)
1008.010/num_female_police	1008.010	num_female_police	How many female Police?	Police na quartier mobile: firy vehivavy? (999 raha tsy aiko)
1008.011/village_pop_1_yr_ago	1008.011	village_pop_1_yr_ago	How many people lived in this village last year?	Firy olona nipetraka an-tanàna tamin'ny taona lasa? (999 raha tsy aiko)
1008.012/village_pop_10_yr_ago	1008.012	village_pop_10_yr_ago	How many people lived in this village 10 years ago?	Firy olona nipetraka an-tanàna tamin'ny folo taona lasa? (999 raha tsy aiko)
1008.013/over_55s	1008.013	over_55s	How many people in the village are more than 55 years old?	Firy ny isan'ny olona mihoatra ny 55 taona an ity tanàna ity? (9999 raha tsy aiko)
1008.014/male_pref_jobs	1008.014	male_pref_jobs	For males: what kinds of jobs do you like?	Ho an'ny lehilahy: Inona no karazana asa tena tianao?
1008.015/female_pref_jobs	1008.015	female_pref_jobs	For females: what kinds of jobs do you like?	Ho an'ny vehivavy: Inona no karazana asa tena tianao?
