# Supplementary material for: Study Protocol: A Cross-Sectional Examination of Socio-Demographic and Ecological Determinants of Nutrition and Disease Across Madagascar
Source: Front Public Health. 2020 Sep 17;8:500. doi: 10.3389/fpubh.2020.00500 (PMC7527467; doi:10.3389/fpubh.2020.00500)
Supplement: Supplementary file 6 [file Data_Sheet_5.XLSX]

## Sheet: 5 Individuals
Column headings	Question ID	Variable_Name	English question text	Malagasy question text
Section 01: ID and gender			Section 01: ID and gender	Section 01: ID des individus et genre
5001.001/gender	5001.001	gender	Gender	Genre
5001.002/hh_id	5001.002	hh_id	Harvard Household ID	Harvard Menage ID (###)
5001.003/ind_id	5001.003	ind_id	Harvard Individual	Harvard Individu ID (##)
5001.004/birth_year	5001.004	birth_year	DOB: Year	Daty nahaterahana: Taona (####)
5001.005/birth_month	5001.005	birth_month	DOB: Month	Daty nahaterahana: Volana
5001.006/birth_day	5001.006	birth_day	DOB: Day	Daty nahaterahana: Andro (##)
5001.007/dob_confirmed	5001.007	dob_confirmed	Actual or approximate DOB?	TENA Taona na VERS Taona?
5001.008/age_calc	5001.008	age_calc	Calculated age (2017 minus year of birth)	Taonan'ilay olona
Section 02: Anthropometry and direct measures (R3V only)			Section 02: Anthropometry and direct measures (recorded in individuals survey for R3V only)	Section 02: Lanja: Anthropometry and direct measures (R3V only)
5002.001/height_cm	5002.001	height_cm	Height (cm)	Taille (##.# or ###.#)
5002.002/weight_kg	5002.002	weight_kg	Weight (kg)	Poids (#.# or ##.# or ###.#)
5002.003/muac_cm	5002.003	muac_cm	MUAC (cm)	MUAC (##.#)
5002.004/cdlt_cm	5002.004	cdlt_cm	Cranial circumference (cm)	Circonference de la tete (CDLT) (##.#)
Section 03: Development and disability			Section 03: Development and disability	Section 03: Développement et handicap
5003.001/physical_disability	5003.001	physical_disability	Does this individual have a physical disability that prevents them from moving like others their own age?	Manana fahasembanana ara-batana ve io olona io izay manjary lasa sakana amin'ny fihetsiny raha hoarina amin'ny ireo olona mitovy taona aminy?
5003.002/desc_disability	5003.002	desc_disability	Please describe the disability.	Inona ilay fahasembanana ara-batana?
5003.003/blind	5003.003	blind	Does this individual have any issues with blindness/sight?	Manana fahasembanana amin'ny maso ve ilay olona mety hoe fahajambana/ fahajambana ilany fotsiny?
5003.004/blind_both_eyes	5003.004	blind_both_eyes	Blind in both eyes	Jamba manontolo?
Section 04: Health Recall			Section 04: Health Recall	Section 04: Fampatsahivana ny toe-pahasalamana amin'ny ankapobeny
4.1 General Health Recall			4.1 General Health Recall	4.1 Fampatsahivana ny toe-pahasalamana (general)
5004.001/12month_rate_health	5004.001	12month_rate_health	On average within the last 12 months, how would you generally rate your health? (Bad, good, great)	Amin'ny ankapobeny tao anatin'ny 12 VOLANA LASA, ahoana ny fahitanao/fahatsapanao ny fahasalamanao (ratsy, tsara, tsara be)?
5004.002/today_rate_heatlh	5004.002	today_rate_heatlh	Today, how would you generally rate your health?	Ankehitriny ahoana no fahitanao/fahatsapanao ny fahasalamanao (ratsy, tsara, tsara be)?
5004.003/today_health_complaint	5004.003	today_health_complaint	Today, what is your most health complaint?	Inona no olana ara-pahasalama tena mahazo anao amin'izao fotoana izao?
5004.004/num_ill_days_1mo	5004.004	num_ill_days_1mo	Within the last month, how many days have you been too ill to work/study?	Tao anatin'ny VOLANA LASA, firy andro ianao no narary ka tsy afaka nandeha nianatra na tsy nandeha niasa?
5004.005/2weeks_fever	5004.005	2weeks_fever	In the past two weeks, have you had a fever?	Tao anatin'ny ROA HERINANDRO LASA, nafana hoditra na voan'ny tazo ve ianao ?
5004.006/fever_or_malaria	5004.006	fever_or_malaria	Was this a minor fever or malaria? (fever, malaria, other)	Fanaviana tsotsotra sa tena tazo?
5004.007/12month_malaris	5004.007	12month_malaris	Within the last 12 months, have you had malaria?	Tao anatin'ny 12 VOLANA LASA tratran'ny tazo moka na paludisme ve ianao?
5004.008/4weeks_malaria	5004.008	4weeks_malaria	Whithin the last 4 weeks, have you had malaria?	Tao anatin'ny 4 HERINANDRO LASA tratran'ny tazo moka na paludisme ve ianao?
5004.009/2weeks_diarrhea	5004.009	2weeks_diarrhea	In the past two weeks, have you had diarrhea (meaning 3 or more watery/loose stools in one day)?	Tao anatin'ny ROA HERINANDRO lasa, nivalana ve ianao (izany hoe nivalan-drano mihotra ny in-3 anatin'ny iray andro)?
5004.010/blood	5004.010	blood	If YES: any blood?	Raha eny: Nisy ra ve io fivalananao?
5004.011/lose_weight	5004.011	lose_weight	If YES: have you lose weight?	Raha eny: Nampihena anao ve ilay fivalalana?
5004.012/meds_now	5004.012	meds_now	Do you take any medication now?	Mihinana fanafody ve ianao izao?
5004.013/type_meds_now	5004.013	type_meds_now	If YES: What type of medication?	Raha eny, Inona ilay fanafody?
5004.014/type_meds_now_other	5004.014	type_meds_now_other	If other: What type of medication?	Raha hafa, Inona ilay fanafody?
5004.015/meds_2weeks	5004.015	meds_2weeks	In the last two weeks, have you used any medication?	Tamin'ny ROA HERINANDRO lasa, nihinana fanafody ve ianao?
5004.016/type_meds_2weeks	5004.016	type_meds_2weeks	If YES, what type of medication?	Raha eny, inona no fanafody nohaninao?
5004.017/type_meds_2weeks_other	5004.017	type_meds_2weeks_other	If other, what type of medication?	Raha hafa, inona no fanafody nohaninao?
5004.018/2weeks_supplements	5004.018	2weeks_supplements	In the last two weeks, have you taken any vitamins or supplements?	Tao anatin'ny ROA HERIANDRO LASA nihinana vitamine na "supplements" ve ianao (Calcium, Fer, Vitamine C, sns)?
5004.019/type_supplements	5004.019	type_supplements	If YES, what type of vitamins or supplements?	Rana eny, karazana vitamine sy "supplements" inona? (lazao daholo izay possible)
5004.020/type_supplements_other	5004.020	type_supplements_other	If other, what type of vitamins or supplements?	Rana hafa, karazana vitamine sy "supplements" inona? (lazao daholo izay possible)
5004.021/prompt_visible_issue	5004.021	prompt_visible_issue	Enumerator: DO NOT ASK (note things that are visible only)	Prompt: AZA HANONTANIANA
5004.022/visible_issue	5004.022	visible_issue	DON'T ASK: Do you notice any other health issues or any physical disabilities ?	AZA HANONTANIANA: Misy olana ara-pahasalama hafa na ara-batana hitanao ve?
4.2 DEWORMING MEDICATION			4.2 DEWORMING MEDICATION	4.2 ODY KAKANA
5004.023/ever_deworm	5004.023	ever_deworm	Have you ever been dewormed?	Efa nihinana fanafody kakana/kantsetsitra?
5004.024/year_deworm	5004.024	year_deworm	When was the last time you were dewormed? (YEAR)	Oviana ianao no nihinana ody kakana farany? TAONA
5004.025/month_deworm	5004.025	month_deworm	When was the last time you were dewormed? (MONTH)	Oviana ianao no nihinana ody kakana farany? VOLANA
5004.026/day_deworm	5004.026	day_deworm	When was the last time you were dewormed? (DAY)	Oviana ianao no nihinana ody kakana farany? ANDRO
5004.027/deworm_meds	5004.027	deworm_meds	If dewormed, what type of medication did you last use?	Inona no fanafody kakana nohaninao?
5004.028/deworm_meds_other	5004.028	deworm_meds_other	If other, what medicine?	Raha hafa, inona no fanafody nohaninao?
5004.029/num_meds	5004.029	num_meds	How many per day did you take?	Firy isan-andro nohaninao?
5004.030/num_days	5004.030	num_days	How many days did you take it?	Firy andro ianao no nihinana azy?
4.3 VACCINATION			4.3 VACCINATION	4.3 VAKSINY
5004.031/prompt_vacc_card	5004.031	prompt_vacc_card	Prompt: Vaccine Card	Prompt: Karatra Vaksiny
5004.032/vacc_card	5004.032	vacc_card	Do he/she have a card or other document(s) where (NAME)'s vaccinations are written down?	Manana taratasy na karatra ahitana ireo vaksiny nataonao ve na hoe inona ireo vaksiny nataonao?
5004.033/polio_vac	5004.033	polio_vac	Have you received polio vaccination (0 - 14 days)?	Nanao vaksiny polio (deboka ambava in-2 na tete vava / P0) ve ianao? (0-14 andro)
5004.034/6week_vac	5004.034	6week_vac	Have you received the 6-week vaccination: DTC1, Hep B1, Hib1, Polio 1 (P1) and PCV10.1?	Nanao vaksiny 6 herinandro (tsindrona fe havia=DTC1, Hep B1, Hib1. Polio 1 (P1), Rota1.tsindrona fe havanana=PCV10.1) ve ianao?
5004.035/10week_vac	5004.035	10week_vac	Have you received the 10-week vaccination: DTC2, Hep B2,Hib2, Polio 2 (P2), Rota2, PCV10.2?	Nanao vaksiny 10 herinandro (DTC2, Hep B2,Hib2, Polio 2 (P2), Rota2, PCV10.2) ve ianao?
5004.036/14week_vac	5004.036	14week_vac	Have you received the 14-week vaccination: DTC3, Hep B3,Hib3, PCV10.3, Polio 3 (injection) (VPI))?	Nanao vaksiny 14 herinandro (DTC3, Hep B3,Hib3, PCV10.3, Polio 3 (injection) (VPI))?
5004.037/measles_vac	5004.037	measles_vac	Have you received measles vaccination (VAR)?	Nanao vaksiny rougeole (VAR) (vaksiny atao amin'ny sandry ambony) (aminy 9 volana) ve ianao?
Section 05: Disease Risk Questions:			Section 05: Disease Risk Questions:	Section 05: Risque maladies questions
5005.001/prompt_dis_risk	5005.001	prompt_dis_risk	Prompt: Disease risk questions	Prompt: Risque maladies questions
5005.002/currently_bednet	5005.002	currently_bednet	Do you currently use a bednet?	Mampiasa lay ve ianao amin'izao fotoana izao?
5005.003/lastnight_bednet	5005.003	lastnight_bednet	Did you use a bednet last night?	Nampiasa lay ve ianao omaly alina?
5005.004/bednet_holes	5005.004	bednet_holes	Does your bednet have holes?	Misy lavaka na goaka ve ilay lay hampiasainao?
5005.005/seasons_bednet	5005.005	seasons_bednet	Are there seasons when you don’t use a bednet?	Misy vanim-potoana manokana ve ianao tsy mampiasa lay?
5005.006/month_bednet	5005.006	month_bednet	If YES, which months do you not use a bednet?	Volana inona?
5005.007/why_bednet	5005.007	why_bednet	Why do you not use a bednet during those seasons?	Inona no antony mahatonga anao tsy mampiasa lay amin' ireo fotoana ireo?
Section 06: Animal contact questionnaire			Section 06: Animal contact questionnaire	Section 06: Contact animal questionnaire
	5006.001	prompt_contact_hist	Prompt: During your life have you ever…	Prompt: Nandritra ny fiainanao efa…
5006.002/dog_bite	5006.002	dog_bite	Been bitten by a dog where it broke the skin?	Efa voakaikitrin'ny alika ve ianao ka nandratra anao?
5006.003/poultry_bite	5006.003	poultry_bite	Been bitten by a chicken or duck where it broke the skin?	Efa voakaikitrin'ny akoho na vorondrano ve ianao ka nandratra anao?
5006.004/bat_bite	5006.004	bat_bite	Been bitten by a bat where it broke the skin?	Efa voakaikitrin'ny ramanavy ve ianao ka nandratra anao?
5006.005/bat_touch	5006.005	bat_touch	Touched a bat dead or alive?	Nikasika ramanavy maty na velona?
5006.006/lemur_bite	5006.006	lemur_bite	Been bitten by a lemur where it broke the skin?	Efa voakaikitrin'ny gidro ve ianao ka nandratra anao?
5006.007/lemur_touch	5006.007	lemur_touch	Touched a lemur dead or alive?	Nikasika gidro maty na velona?
Section 07: Depression and perceived stress			Section 07: Depression and perceived stress	Section 07: La dépression et le stress perçu
5007.001/prompt_mental_recall	5007.001	prompt_mental_recall	Have you experienced the following in the last two weeks?	Niseho taminao ve ireto tranga ireto tamin'ny roa herinandra lasa?
5007.002/little_interest	5007.002	little_interest	Little interest or pleasure in doing things?	Fahakamoana na tsy fisiana fahafinaretana hanao zavatra?
5007.003/depressed	5007.003	depressed	Feeling down, depressed, or hopeless?	Kivikivy, ketraka/malahelo, na resy amin'ny fiainana?
5007.004/num_ppl_emergency	5007.004	num_ppl_emergency	How many people in this community can you count on in an emergency?	Firy ny olona azo antoka fa hanampy anao raha sendra misy "urgence" na vonjy taitra mahazo anao?
Section 08: Measles history			Section 08: Measles history	Section 08: Bonibony
5008.001/ever_measles	5008.001	ever_measles	For children 5 years or younger, Has (NAME) ever had measles?	Efa tratran'ny BONIBONY ve [ANARANA]?
5008.002/year_measles	5008.002	year_measles	Recall date (year)	Taona?
5008.003/ever_measles_symptoms	5008.003	ever_measles_symptoms	For children 5 years or younger, Has (NAME) ever had fever and rash and either cough or runny nose or red eyes?	Efa tratran'ny fanaviana sy fivontosana manjinika kely maro sy kohaka na sery na maso mena?
5008.004/year_measles_symptoms	5008.004	year_measles_symptoms	IF YES: Recall the date (year)?	Taona ?
Section 09: Reproductive Aged Women			Section 09: Reproductive Aged Women	Section 09: Femme en âge de procréer
9.1: Period Questions			9.1: Period Questions	9.1: Fanontaniana momba fandimbolana
5009.001/gotten_period	5009.001	gotten_period	Have you gotten your period?	Efa tonga/efa nanomboka ve ny fandimbolanao?
5009.002/still_period	5009.002	still_period	Do you still have your period? (R2V only)	Mbola misy fandimbolana ianao ankehitriny?
5009.003/still_period_meno	5009.003	still_period_meno	If no, have you had menopause? (R2V only)	Raha tsy tonga ny fadimbolana na tsy bevohoka/misy ronono ny nono, efa "menopause" ve ianao ? (99 raha tsy aiko)
5009.004/period_still_or_stop	5009.004	period_still_or_stop	Period: Still having period OR stop having period because of pregnancy or breastfeeding OR stop having period (menopause)?	Fandimbolana: Mbola tonga fotoana NA nijanona ny fandimbolana satria bevohoka na mampinono zaza NA nijanona satria nisy antony hafa NA tapitra tsy misy fandimbolana intsony?
5009.005/age_first_period	5009.005	age_first_period	At what age did you first get your period?	Firy taona ianao no nisy fandimbolanao voalohany?
5009.006/year_last_period	5009.006	year_last_period	Last period: YEAR	Oviana no TAONA nisy fandimbolana farany?
5009.007/month_last_period	5009.007	month_last_period	Last period: MONTH	Oviana no VOLANA nisy fandimbolana farany?
5009.008/day_last_period	5009.008	day_last_period	Last period: DAY	Oviana no ANDRO nisy fandimbolana farany?
5009.009/date_last_period	5009.009	date_last_period	Actual or approximate date?	Tena daty na daty tombana / vers?
9.2: Questions about having children			9.2: Questions about having children	8.2: Fanontaniana momba ny hananan-janaka
5009.010/want_more_children	5009.010	want_more_children	Do you want any (more) children?	Mbola tia hanan-janaka ve ianao na maniry ny hanan-janaka ve ianao?
5009.011/use_birth_control_method	5009.011	use_birth_control_method	Do you and your husband currently do anything to delay or prevent a pregnancy?	Mampiasa fomba fanabeazana aizana ve ianao sy ny vadinao mba hisorohana amin'ny vohoka na hanemorana ny vohoka?
5009.012/type_birth_control_method	5009.012	type_birth_control_method	If yes, what are you doing (which method are you using) NOW to delay or prevent a pregnancy?	Ankehitriny inona ireo fomba fanabeazana aizana fampiasanao na ny vadinao mba hanemorana na hisorohana ny vohoka ?
5009.013/bc_method_other	5009.013	bc_method_other	If other, which method are you using?	Raha hafa, Ankehitriny inona ireo fomba fanabeazana aizana fampiasanao na ny vadinao mba hanemorana na hisorohana ny vohoka ?
5009.014/access_contraception	5009.014	access_contraception	Do you have access to contraception?	Misy na ahitana na manolotra na mampianatra na mizara fomba fanabeazana aizana aty aminareo?
5009.015/use_contraception	5009.015	use_contraception	If YES, do you use contraception?	Mampiasa fomba fanabeazana aizana ve ianao?
5009.016/why_not_contraception	5009.016	why_not_contraception	If NO, why not?	Inona no antony mahatonga anao tsy mampiasa azy?
5009.017/why_not_contraception_other	5009.017	why_not_contraception_other	If other why not?	Raha hafa, Inona no antony mahatonga anao tsy mampiasa azy?
9.3: Pregnancy, prenatal consultations, child death			9.3: Pregnancy, prenatal consultations, child death	9.3: Bevohoka, Fisafoana, Zaza maty
5009.018/currently_pregnant	5009.018	currently_pregnant	Are you pregnant?	Bevohoka ve ianao izao?
5009.019/num_months_pregnant	5009.019	num_months_pregnant	If YES, how many month(s)?	Bevohoka firy volana ianao izao?
5009.020/ever_pregnant	5009.020	ever_pregnant	Have you ever been pregnant?	Efa bevohoka ve ianao?
5009.021/last_pregnancy_prenatal_visits	5009.021	last_pregnancy_prenatal_visits	Did you have prenatal visits during last pregnancy?	Nanao fisafoana ve ianao tamin'ny bevohaka farany?
5009.022/num_prenatal_visits	5009.022	num_prenatal_visits	If YES, how many prenatal visits before last delivery?	Impiry nanao fisafoana alohan'ny fiterahana farany?
5009.023/type_prenatal_care	5009.023	type_prenatal_care	What type of care did you seek?	Inona no karazana fitsaboana nandehananao tany?
5009.024/prenatal_supplements	5009.024	prenatal_supplements	Did you take prenatal vitamins ever?	Efa nihinana vitamines talohan'ny fiterahana ve ianao?
5009.025/full_supplement_schedule	5009.025	full_supplement_schedule	If YES, did you adhere and follow the full schedule of vitamins?	Nanaiky sy nanaraka ny toromarika amin'ny fotoana fihinanana azy ve ianao?
5009.026/why_not_prenatal_care	5009.026	why_not_prenatal_care	If NO to prenatal visit, why did you not seek care?	Inona no antony tsy nanaovanao fisafoana?
5009.027/why_not_prenatal_care_other	5009.027	why_not_prenatal_care_other	If other to prenatal visit, why did you not seek care?	Raha hafa, Inona no antony tsy nanaovanao fisafoana?
5009.028/ever_given_birth	5009.028	ever_given_birth	Have you ever given birth?	Efa niteraka?
5009.029/location_last_birth	5009.029	location_last_birth	Where did you give birth for your last child?	Taiza ianao no niteraka tamin'ilay zaza farany?
5009.030/location_last_birth_other	5009.030	location_last_birth_other	If other, Where did you give birth for your last child?	Raha hafa, Taiza ianao no niteraka tamin'ilay zaza farany?
5009.031/after_birth_traditional_meds	5009.031	after_birth_traditional_meds	Following birth did you use any traditional medicines or uterotonics?	Tao aorinan'ny niterahanao ve nampiasa fanafody nentim-paharazana ianao na uterotonics ?
5009.032/type_traditional_med	5009.032	type_traditional_med	Describe the traditional medicine/uterotonic.	Inona ilay fanafody nentim-paharazana/uterotonic ?
5009.033/ever_miscarriage	5009.033	ever_miscarriage	Have you ever had a miscarriage?	Efa afa-jaza ve ianao?
5009.034/num_months_prior_miscarriage	5009.034	num_months_prior_miscarriage	Number of months pregnant when event occurred?	Firy volana ny kibonao no afa-jaza?
5009.035/month_miscarriage	5009.035	month_miscarriage	Month of event	Volana inona?
5009.036/location_miscarriage	5009.036	location_miscarriage	Where did the miscarriage occur?	Taiza no afa-jaza?
5009.037/location_miscarriage_other	5009.037	location_miscarriage_other	If other, Where did the miscarriage occur?	Raha hafa, Taiza no afa-jaza?
5009.038/ever_stillbirth	5009.038	ever_stillbirth	Have you ever had a stillbirth?	Efa nisy zaza maty tany ambohoka ve ?
5009.039/num_months_prior_stillbirth	5009.039	num_months_prior_stillbirth	Number of months pregnant when event occurred?	Firy volana ny kibonao?
5009.040/month_stillbirth	5009.040	month_stillbirth	Month of event	Volana inona?
5009.041/location_stillbirth	5009.041	location_stillbirth	Where did the stillbirth occur?	Taiza no niseho?
5009.042/location_stillbirth_other	5009.042	location_stillbirth_other	If other, Where did the stillbirth occur?	Raha hafa, Taiza no niseho?
5009.043/infant_death_1yr	5009.043	infant_death_1yr	Have you ever had a child die with the first year after birth?	Efa nisy zaza maty tao aorinan'ny fiterahana ve (tao anatin'ny TAONA voalohany nahaterahany)?
5009.044/infant_death_uns	5009.044	infant_death_uns	Have you ever had a child die around the time of birth? (R2V only)	Efa nisy zaza maty tao aorinan'ny fiterahana ve? (R2V only)
5009.045/cause_infant_death	5009.045	cause_infant_death	What was the cause of death?	Inona no antony nahatonga ilay zaza maty tao aorinan'ny fiterahana?
5009.046/infant_death_uns_days	5009.046	infant_death_uns_days	How many days after birth did the child die? (99 for IDK) (R2V Only)	Firy ANDRO tao aorin`ny nahaterahan`ilay zaza kibonao no niseho ilay izy? (99 raha tsy aiko) (R2V Only)
5009.047/infant_death_uns_mo1	5009.047	infant_death_uns_mo1	How many months pregnant when it happened? (99 for IDK) (erroneous question) (R2V only)	Firy volana ny kibonao no niseho ilay izy? (99 raha tsy aiko) (R2V only)
5009.048/infant_death_uns_mo2	5009.048	infant_death_uns_mo2	In what month did it happen?	Volana inona?
5009.049/num_months_prior_infant_death	5009.049	num_months_prior_infant_death	Number of months after birth when event occurred?	Firy VOLANA tao aorin'ny nahaterahan'ilay zaza no niseho ilay izy?
5009.050/num_days	5009.050	num_days	If less than ONE month, how many days?	Raha latsaky 1 VOLANA, firy andro?
5009.051/num_hours	5009.051	num_hours	If less than 3 days, how many hours?	Raha latsaky 3 ANDRO, firy lera?
5009.052/location_infant_death	5009.052	location_infant_death	Where did it occur?	Taiza no nitranga?
5009.053/location_infant_death	5009.053	location_infant_death	If other, Where did it occur?	Raha hafa, Taiza no nitranga?
9.4: Breastfeeding			9.4: Breastfeeding	9.4: Fampinonoana
5009.054/currently_breastfeeding	5009.054	currently_breastfeeding	Are you breastfeeding now?	Mampinono ve ianao izao?
5009.055/month_breastfeeding	5009.055	month_breastfeeding	How many months have you breasfed?	Firy volana no nampinono?
5009.056/exclusive_breastfeeding	5009.056	exclusive_breastfeeding	Do you exclusively breastfeed your child?	Nono fotsiny ve omenao ny zanakao?
5009.057/num_months_with_food	5009.057	num_months_with_food	If NO, how many months ago did you introduce foods?	Raha tsia, firy volana lasa ianao no nanomboka nanome sakafo azy?
5009.058/ever_breastfeed	5009.058	ever_breastfeed	Did you ever breastfeed your child?	Efa nampinono zaza ve ianao?
5009.059/month_breastfeed	5009.059	month_breastfeed	If yes, for how many months did you breastfeed your last child?	Nandritra ny firy volana ianao no nampinono ny zanakao farany?
5009.060/exclusive_breastfeed	5009.060	exclusive_breastfeed	For how many months did you exclusively breastfeed your last child?	Nandritra ny firy volana no nono FOTSINY no nomenao ny zanakao farany?
5009.061/time_waitto_breastfeed_last_child	5009.061	time_waitto_breastfeed_last_child	How long after birth did you wait before first breastfeeding your most recent child?	Hafiriana tao aorinan'ny nahaterahan'ny zanakao farany ianao no nampinono voalohany?
5009.062/complimentary_foods	5009.062	complimentary_foods	In addition to breast milk what did your most recent child consume during the first six months of life?	Ankoatra ny fampinonoana, inona no nomenao ny zanakao tamin'ny enim-bolana voalohany nahaterahany?
5009.063/complimentary_foods_other	5009.063	complimentary_foods_other	If other, In addition to breast milk what did your most recent child consume during the first six months of life?	Raha hafa, Ankoatra ny fampinonoana, inona no nomenao ny zanakao tamin'ny enim-bolana voalohany nahaterahany?
5009.064/num_months_complimentary_foods	5009.064	num_months_complimentary_foods	After how many months of exclusive breastfeeding did your child first eat or drink any of these?	Firy volana tao aorinan'ny fampinonoana no nomenao sakafo voalohany na zavatra sotroina voalohany ilay zaza ?
9.5: Marriage Questions			9.5: Marriage Questions	9.5: Fanontaniana momba manambady
5009.065/ever_married	5009.065	ever_married	Have you ever gotten married?	Efa nanambady ve ianao?
5009.066/age_first_marriage	5009.066	age_first_marriage	At what age were you first married?	Firy taona ianao no nanambady ?
5009.067/age_spouse	5009.067	age_spouse	How old was your spouse when you were married?	Firy taona ny vadinao taminao nivady taminy?
9.6: Work in the home			9.6: Work in the home	9.6: Asa kely ao an-trano
5009.068/hours_yesterday	5009.068	hours_yesterday	How many hours did you spend doing the following activities yesterday?	Adiny firy ny ora laninao nanaovana ireto zavatra ireto omaly?
5009.069/babysitting	5009.069	babysitting	Baby sitting	Fiandrasana zaza
5009.070/food_prep	5009.070	food_prep	Food preparation	Fanaovana sakafo
5009.071/water_collection	5009.071	water_collection	Water collection	Fatsakana rano
5009.072/clearning	5009.072	clearning	Cleaning	Fanadiovana
5009.073/fuel_collection	5009.073	fuel_collection	Firewood/fuel collection	Fangalana kitay
5009.074/other	5009.074	other	Other	Hafa
5009.075/currently_attend_school	5009.075	currently_attend_school	Do you still go to school?	Mbola mandeha sekoly?
5009.076/labor_and_school	5009.076	labor_and_school	If a student, do you do these activities (above) before and after school?	Raha mpianatra, Nanao ireo zavatra voalaza teo ambony teo ve ianao alohan'ny hianatra sy avy mianatra?
5009.077/labor_and_missed_school	5009.077	labor_and_missed_school	Have you ever missed school to do any of these activities?	Efa nisy fotoana ve ianao tsy nandeha tany ampianarana nohon'ireo zavatra voalaza teo ambony ireo?
5009.078/num_missed_school	5009.078	num_missed_school	If so, how many times in the past month?	Impiry tamin'ny volana lasa?
5009.079/currently_pnnc	5009.079	currently_pnnc	Do you currently go to the PNNC/Seecaline center?	Mandeha mankany amin'ny toby PNNC/Secaline ve ianao amin'izao fotoana izao?
5009.080/ever_pnnc	5009.080	ever_pnnc	Have you ever gone to the PNNC/Seecaline center?	Efa nandeha tany amin'ny toby PNNC/Seealine ve ianao taloha?
Section 10: Parents' place of birth			Section 10: Parents' place of birth	Section 10: Fiavian'ny ray aman-dreny
5010.001/prompt_parents_birth_loc	5010.001	prompt_parents_birth_loc	Prompt: Birthplace of father and mother	Prompt: Fiavian'ny ray aman-dreny
5010.002/father_birth_village	5010.002	father_birth_village	Village name of where your father was born?	Anaran'ny tanàna nahaterahan'ny ray?
5010.003/father_birth_village_other	5010.003	father_birth_village_other	If other, Village name of where your father was born?	Raha hafa, Anaran'ny tanàna nahaterahan'ny ray?
5010.004/mother_birth_village	5010.004	mother_birth_village	Village name of where you mother was born?	Anaran'ny tanàna nahaterahan'ny reny?
5010.005/mother_birth_village_other	5010.005	mother_birth_village_other	If other, Village name of where you mother was born?	Raha hafa, Anaran'ny tanàna nahaterahan'ny reny?
5010.006/NGO_activity	5010.006	NGO_activity	What are the Fararano "activities" that have been done? (R2V only)	Inona avy ireo "activity" FARARANO handraisanao hanjara (R2V only)
Section 11: Cell phones			Section 11: Cell phones	Section 11: Finday
5011.001/HH_mobiles	5011.001	HH_mobiles	Are there functional cell phones in this household?	Misy telefonina portable mandeha ve ato amin'ity tokantrano ity?
5011.002/num_HH_mobiles	5011.002	num_HH_mobiles	How many cell phones are functional in your household?	Firy ny telefonina portable miasa ato aminareo?
5011.003/currently_own_mobile	5011.003	currently_own_mobile	Do you own a cell phone?	Manana finday ve ianao?
5011.004/num_sim_cards	5011.004	num_sim_cards	How many SIM cards do you own?	Firy ny isan'ny "puce"-nao mbola ampiasaina?
5011.005/mobile_providers	5011.005	mobile_providers	What companies provide you with cell service?	Iza avy ireo orinasam-pinday fampiasanao?
5011.006/most_common_mobile_provider	5011.006	most_common_mobile_provider	Which company do you use most regularly?	Iza no orinasam-pinday tena matetika fampiasanao?
5011.007/use_of_mobile	5011.007	use_of_mobile	How do you use your phone?	Hampiasainao amin'ny inona ny findainao?
5011.008/use_of_mobile_other	5011.008	use_of_mobile_other	If other, How do you use your phone?	Raha hafa, Hampiasainao amin'ny inona ny findainao?
5011.009/num_sms_week	5011.009	num_sms_week	How many SMS do you send in a week?	Mandefa SMS firy eo ianao isaky ny herinandro?
5011.010/num_call_week	5011.010	num_call_week	How often do you make call in a week?	Impiry miantso eo ianao isaky ny herinandro?
5011.011/minutes_average_call	5011.011	minutes_average_call	What is the average length of your phone call in minutes?	Maharitra firy minitra eo ny resakao amin'ny telefonina?
5011.012/travel_with_mobile	5011.012	travel_with_mobile	Do you bring your phone when you travel?	Mitondra ny finday-nao ve ianao rehefa mivoaka ny toerana hipetrahanao?
